# Supplementary material
Source: MDPI journal article supplement (https://www.mdpi.com/2076-3417/11/11/4995)
Supplement: s1 [file s1]

**Supplementary Material for**

**LED lighting and high-density planting enhance the cost-  
efficiency of *Halimione portulacoides* extraction units for  
integrated aquaculture**

Marco Custódio\*, Paulo Cartaxana, Sebastián Villasante, Ricardo Calado, Ana I. Lillebø\*

\*Corresponding authors:

E-mail: mfc@ua.pt; Tel.: +351913105645 (M Custódio)

E-mail: lillebo@ua.pt; Tel.: +351961907714 (AI Lillebø)

**Table S1:** Chemical composition of the hydroponic medium

|                                                                                     | <b>Molar mass</b><br><b>(g mol<sup>-1</sup>)</b> | <b>Concentration</b><br><b>(mM)</b>                |
|-------------------------------------------------------------------------------------|--------------------------------------------------|----------------------------------------------------|
| <i>Molecules</i>                                                                    |                                                  |                                                    |
| KNO <sub>3</sub>                                                                    | 101.11                                           | 1.90                                               |
| Ca(NO <sub>3</sub> ) <sub>2</sub> .4H <sub>2</sub> O                                | 236.15                                           | 1.25                                               |
| NH <sub>4</sub> H <sub>2</sub> PO <sub>4</sub>                                      | 115.03                                           | 0.10                                               |
| MgSO <sub>4</sub> . 7H <sub>2</sub> O                                               | 246.48                                           | 0.25                                               |
| KCl                                                                                 | 74.56                                            | 0.05                                               |
| H <sub>3</sub> BO <sub>3</sub>                                                      | 61.83                                            | 0.03                                               |
| MnSO <sub>4</sub> . H <sub>2</sub> O                                                | 169.01                                           | 2e-3                                               |
| ZnSO <sub>4</sub> .7H <sub>2</sub> O                                                | 287.56                                           | 2e-3                                               |
| CuSO <sub>4</sub> . 5H <sub>2</sub> O                                               | 249.68                                           | 5e-4                                               |
| (NH <sub>4</sub> ) <sub>6</sub> Mo <sub>7</sub> O <sub>24</sub> . 4H <sub>2</sub> O | 1235.86                                          | 5e-4                                               |
| FeNaEDTA                                                                            | 367.05                                           | 0.02                                               |
|                                                                                     | <b>Atomic</b><br><b>mass</b>                     | <b>Concentration</b><br><b>(mg L<sup>-1</sup>)</b> |
| <i>Chemical elements</i>                                                            |                                                  |                                                    |
| N                                                                                   | 14.00                                            | 63.00                                              |
| P                                                                                   | 30.97                                            | 3.10                                               |
| S                                                                                   | 32.06                                            | 8.16                                               |
| K*                                                                                  | 39.10                                            | 76.25                                              |
| Ca*                                                                                 | 40.08                                            | 50.01                                              |
| Mg*                                                                                 | 24.31                                            | 6.08                                               |
| Fe                                                                                  | 55.85                                            | 1.12                                               |
| Cu                                                                                  | 63.55                                            | 0.03                                               |
| Zn                                                                                  | 65.38                                            | 0.13                                               |
| Mn                                                                                  | 54.94                                            | 0.11                                               |
| B*                                                                                  | 10.81                                            | 0.27                                               |
| Mo                                                                                  | 95.95                                            | 0.34                                               |

\* These elements are already present in high concentrations in the base saline solution, which are not accounted for in this table. At 20 ppt, Red Sea® saline water has, according to manufacturer's information: 235-248 mg L<sup>-1</sup> Ca; 703-742 mg L<sup>-1</sup> Mg and 213-226 mg L<sup>-1</sup> K.

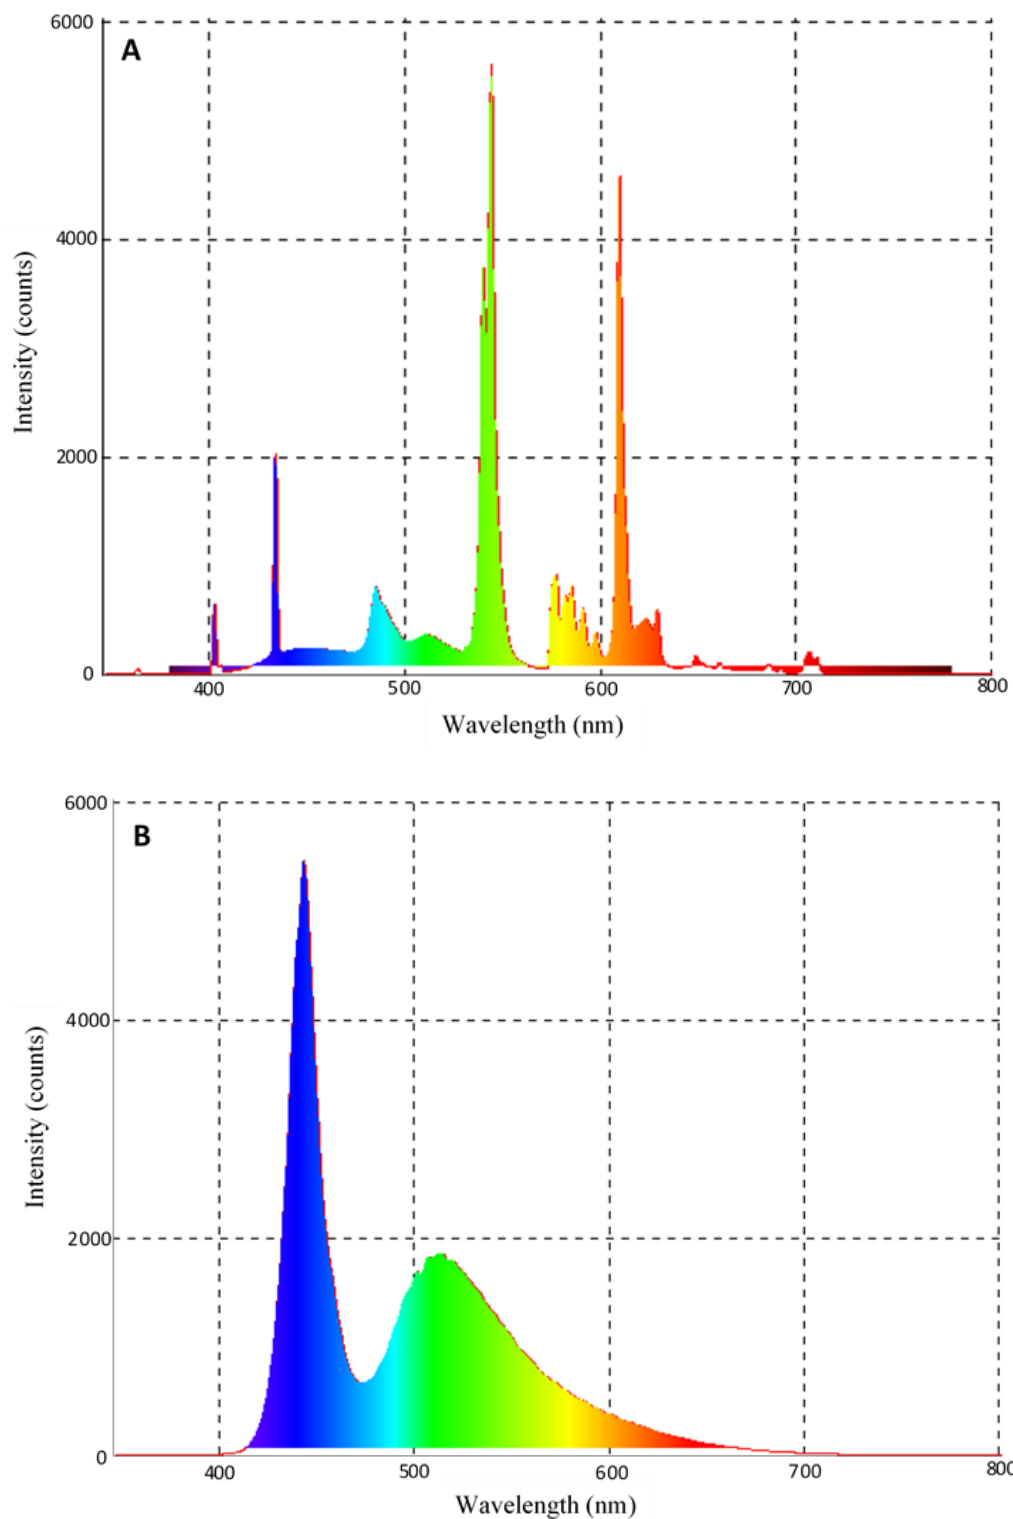

**Figure S1:** Light spectra of A) fluorescent lamps and B) LED measured with an Ocean Optics modular spectrometer, model FLAME-T-VIS-NIR (Ocean Optics Inc., Dunedin, FL, USA)

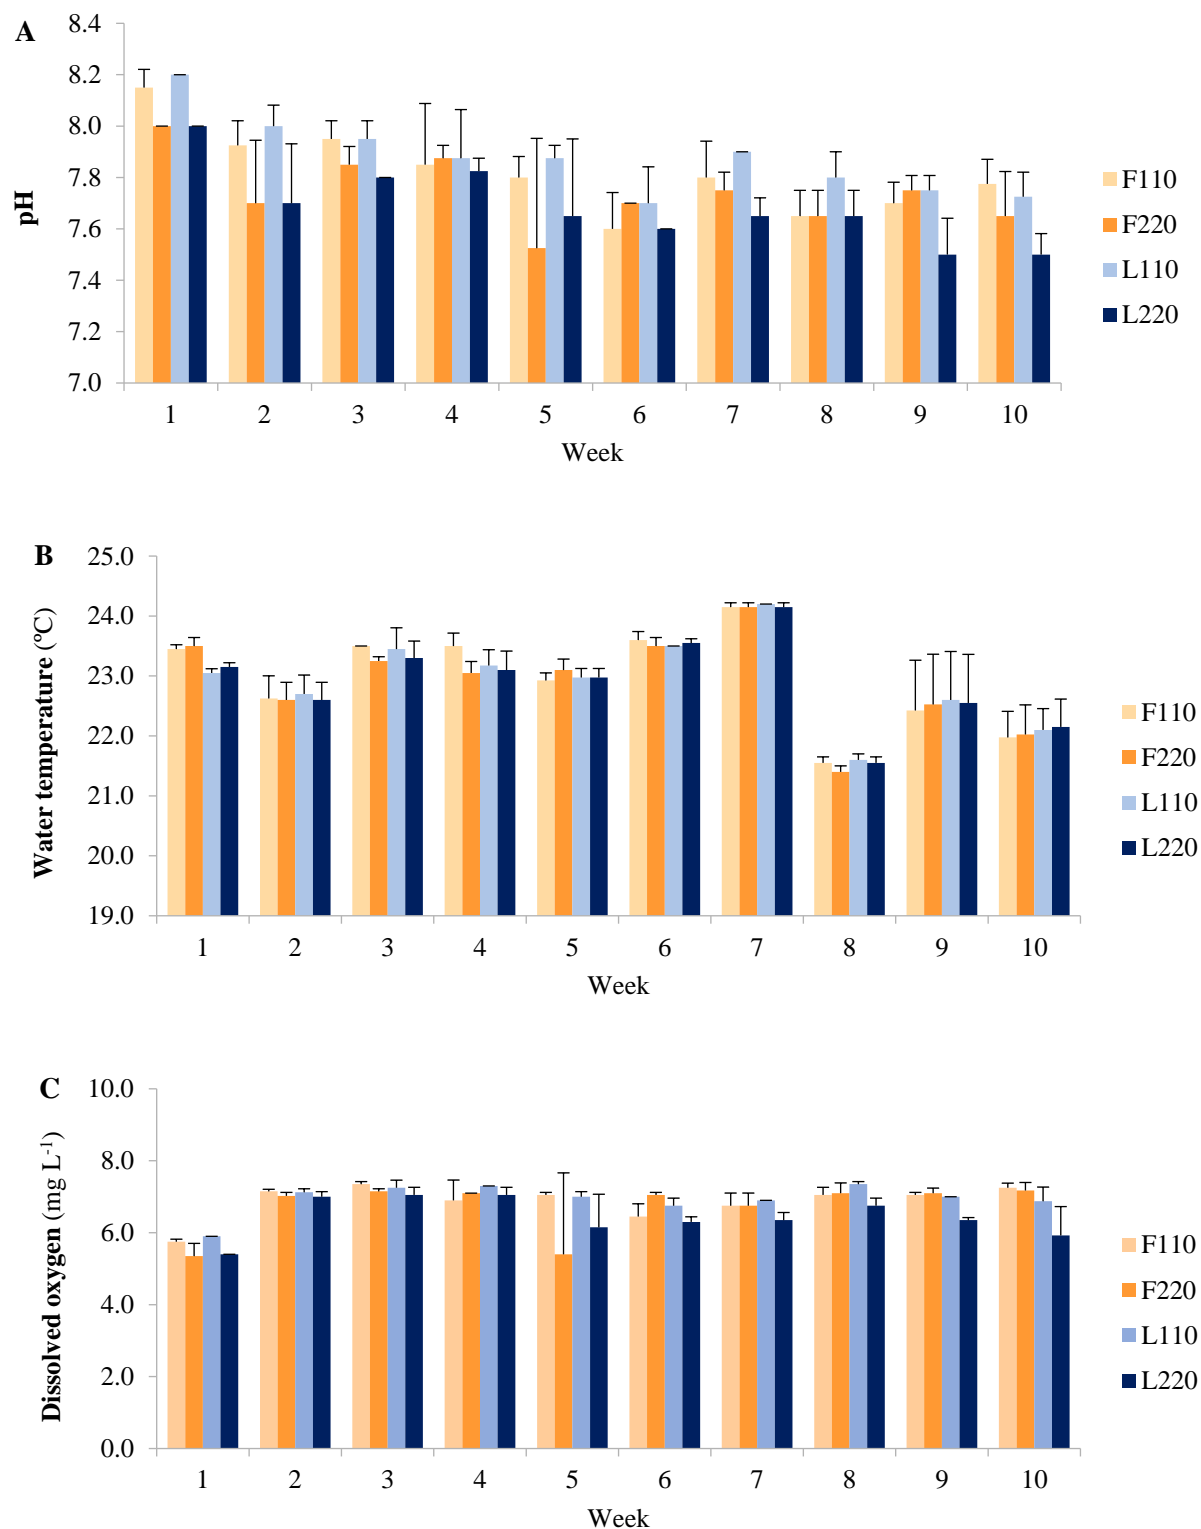

**Figure S2:** Average water A) pH, B) temperature and C) dissolved oxygen. Bars represent standard deviations. F110 = fluorescent lights & 110 plants m<sup>-2</sup>; F220 = fluorescent lights & 220 plants m<sup>-2</sup>; L110 = LEDs & 110 plants m<sup>-2</sup>; L220 = LEDs & 220 plants m<sup>-2</sup>
